# Supplementary material for: Neonatal Inflammatory Markers Are Associated with Childhood B-cell Precursor Acute Lymphoblastic Leukemia
Source: Oxford University Press journal article supplement (doi:10.1158/0008-5472.can-18-0831), 2018-09-14
Supplement: 00085472can180831-sup-198706_2_supp_4840767_p5ml4x.docx [file 00085472can180831-sup-198706_2_supp_4840767_p5ml4x.docx]

**Table S1.** Danish version of the International Classification of Diseases (ICD)-10 codes for infections

| **Subgroups of infections** | **Diagnoses** | **ICD10-codes** |
| --- | --- | --- |
| **Infections of the respiratory system** | Infections in the ear | H60.0–H60.9  H65.0–H67.9 |
| Nasopharyngitis | A36.1  J00.0–J00.9 |
| Sinuitisa | J01.0–J01.9  J32.0–J32.9 |
| Pharyngitisa | J02.0–J02.9 |
| Tonsillitisa | A36.0  J03.0–J03.9  J35.0 |
| Laryngitis and tracheitis | A36.2  J04.0–J05.9  J37.0–J37.9 |
| Acute upper respiratory infections of multiple and unspecified sites | A36.8–A36.9  J06.0–J06.9 |
| Abscessus peritonsillaris | J36.0–J36.9 |
| Influenza | J10.0–J11.9 |
| Pneumonia | A48.1  B01.2  J12.0–J18.9 |
| Other acute lower respiratory infections | A37.0–A37.9  A42.0  J20.0–J22.9 |
| **Infections of the gastrointestinal system** | Intestinal infectious diseases | A00.0–A09.9  A42.1 |
| Hepatitis | B15.0–B19.9 |
| Gastritis and duodenitis | K29.0–K29.9 |
| Appendicitis | K35.0–K37.9 |
| **Infections of the urinary tract** | Nephritis | N08.0  N10.0–N10.9 |
| Cystitis | N30.0 |
| **Sexually transmitted infections** | Syphilis | A50.0–A53.9 |
| Gonorrhea | A54.0–A54.9 |
| Chlamydia | A55.0–A56.9 |
| Anogenital herpes | A60.0–A60.9 |
| HIV/AIDS | B20.0–B24.9 |
| Anogenital warts | A58.0–A58.9  A63.0 |
| Other sexually transmitted infections | A57.0–A57.9  A59.0–A59.9  A63.8–A64.9  B86.9 |
| **Infections of the skin and subcutaneous tissue** | Erysipelas | A46.9 |
| Viral warts | B07.9 |
| Dermatophytosis and other superficial mycoses | B35.0–B36.9 |
| Cellulitis and abscess | L02.0–L03.9 |
| Acute lymphadenitis | L04.0–L04.9 |
| Pilonidal cyst | L05.0–L05.9 |
| Other local infections of skin and subcutaneous tissue | A36.3  L00.0–L01.0  L08.0–L08.9  L30.3 |
| **Infections during pregnancy and puerperium** | Infections of genitourinary tract during pregnancy | O03.0  O03.5  O23.0–O23.9 |
| Sepsis during pregnancy, childbirth and puerperium | O85.0–O85.9 |
| Other infections arising during pregnancy and puerperium | O75.3  O86.0–O86.9  O91.0  O98.1–O98.9 |
| **Other infections** | Certain bacterial diseases | A20.0– A29.9  A32.0–A35.9  A38.0–A41.9  A42.2–A44.9  A48.0  A48.2–A49.9 |
| Spirochaetal disease | A65.0–A69.9 |
| Rickettsiosis | A75.0–A79.9 |
| Viral infections | A80.0–A99.9  B00.0–B02.9  B05.0–B06.9  B08.1–B09.9  B25.0–B34.9 |
| Mycoses | B37.0–B49.9 |
| Protozoal diseases, helminthiases, pediculosis, acariasis and other infestations | B50.0–B83.9 |
| Unspecified infectious diseases | B99.9 |
| Infections of endocrine organs | E32.1 |
| Infections of the nervous system | G00.0–G02.9  G04.0–G05.9 |
| Infections of the eye | H00.0; H01.0  H03.0–H03.1  H06.1  H10.5–H10.8 |
| Infections of the circulatory system | I00.0–I01.9  I30.1  I33.0–I33.9  I40.0 |
| Infections of the musculoskeletal system and connective tissue | M00.0–M01.9  M60.0  M86.0–M86.9 |

**Table S2.** Anatomical Therapeutic Chemical(ATC) classification system codesfor included systemic antimicrobials with information on standard treatment length

| **Type of antimicrobials** | **Subgroup** | **ATC code** | **Standard treatment lengtha** |
| --- | --- | --- | --- |
| **Antibacterials** | Tetracyclines | J01A | 7–10 days |
|  | Beta-lactam antibacterials, penicillins | J01C | 7 days |
|  | Other beta-lactam antibacterials | J01D | 7–10 days |
|  | Sulfonamides and trimethoprim | J01E | 3–6 days |
|  | Macrolides, lincosamides and streptogramins | J01F | 5 days |
|  | Aminoglycoside antibacterials | J01G | 28 days |
|  | Quinolon antibacterials | J01M | 7 days |
|  | Other antibacterials | J01X | 7 days |
| **Antifungals** | Antimycotica | J02A | 1 day |
| **Antimycobacterials** | Agents against tuberculosis | J04A | 7 days |
| **Antivirals** | Direct acting antivirals | J05A | 5–7 days |
| **Antiprotozoals** | Agents against amoebiasis and other protozoal diseases | P01A | 7–10 days |
| **Anthelmintics** | Antinematodal agents | P02C | 3–30 days |

a The maximum standard treatment length was used in analyses of antimicrobials with varying treatment length.
