# Supplementary material for: Neonatal Inflammatory Markers Are Associated with Childhood B-cell Precursor Acute Lymphoblastic Leukemia
Source: Oxford University Press journal article supplement (doi:10.1158/0008-5472.can-18-0831), 2018-09-14
Supplement: 00085472can180831-sup-198706_2_supp_4840777_pzmlnk.docx [file 00085472can180831-sup-198706_2_supp_4840777_pzmlnk.docx]

**Table S3.** Coefficients of Variation (CV) in the applied immunoassay

|  | **Intra assay CV**  **(%)** | **Inter assay CV**  **(%)** |
| --- | --- | --- |
| IL-6 | 3.78 | 13.26 |
| sIL-6Rα | 5.35 | 16.17 |
| IL-8 | 4.56 | 4.35 |
| IL-12 | 8.36 | 6.68 |
| IL-17 | 2.58 | 3.27 |
| IL-18 | 2.16 | 8.39 |
| TGF-β1 | 5.27 | 13.44 |
| MCP-1 | 3.04 | 6.95 |
| CRP | 4.73 | 6.13 |

CRP, C-reactive protein; CV, coefficient of variation; IL, interleukin; MCP, monocyte chemotactic protein; sIL-6R, IL-6 soluble receptor; TGF, transforming growth factor.

Intra assay variations were calculated from 9 measurements of the same sample on each plate the same day.

Inter assay variations were calculated from controls measured on each plate, in total 5 measurements made on different days.

CV was calculated as the ratio of the standard deviation to the mean.

**Table S4.** Pearson’s (above diagonal) and Spearman’s (below diagonal) correlation matrix of the inflammatory markers

|  |  | **Pearson’s correlation coefficients** | | | | | | | | |
| --- | --- | --- | --- | --- | --- | --- | --- | --- | --- | --- |
|  |  | **IL-6** | **sIL-6Rα** | **IL-8** | **IL-12** | **IL-17** | **IL-18** | **MCP-1** | **TGF-β1** | **CRP** |
| **Spearman’s correlation coefficients** | **IL-6** | 1.00 | 0.13 | 0.13 | 0.22 | 0.32 | 0.20 | 0.08 | -0.07 | 0.06 |
| **sIL-6Rα** | 0.16 | 1.00 | 0.37 | 0.12 | 0.26 | 0.11 | 0.43 | 0.35 | 0.22 |
| **IL-8** | 0.08 | 0.42 | 1.00 | 0.22 | 0.21 | 0.08 | 0.38 | 0.18 | 0.36 |
| **IL-12** | 0.32 | 0.12 | 0.21 | 1.00 | 0.17 | 0.09 | 0.08 | -0.12 | 0.29 |
| **IL-17** | 0.43 | 0.29 | 0.18 | 0.15 | 1.00 | 0.23 | 0.09 | 0.04 | 0.16 |
| **IL-18** | 0.17 | 0.12 | 0.07 | 0.07 | 0.25 | 1.00 | 0.22 | -0.07 | 0.10 |
| **MCP-1** | 0.06 | 0.43 | 0.39 | 0.09 | 0.11 | 0.22 | 1.00 | 0.11 | 0.27 |
| **TGF-β1** | -0.06 | 0.35 | 0.15 | -0.16 | 0.05 | -0.03 | 0.13 | 1.00 | -0.11 |
| **CRP** | 0.09 | 0.20 | 0.42 | 0.30 | 0.25 | 0.10 | 0.29 | -0.09 | 1.00 |

CRP, C-reactive protein; IL, interleukin; MCP-1, monocyte chemotactic protein; sIL-6R, IL-6 soluble receptor; TGF, transforming growth factor.
