# Supplementary material for: Neonatal Inflammatory Markers Are Associated with Childhood B-cell Precursor Acute Lymphoblastic Leukemia
Source: Oxford University Press journal article supplement (doi:10.1158/0008-5472.can-18-0831), 2018-09-14
Supplement: 00085472can180831-sup-198706_2_supp_4840778_p9mm99.docx [file 00085472can180831-sup-198706_2_supp_4840778_p9mm99.docx]

| **Table S5.** Association between neonatal concentrations of inflammatory markers and odds ratios of prenatally initiated acute lymphoblastic leukemia (ALL) karyotypes and other ALL karyotypes, respectively. The reported odds ratios correspond to one decile increase in the inflammatory marker. | | | | | | | | |
| --- | --- | --- | --- | --- | --- | --- | --- | --- |
|  | **Prenatally initiated karyotypesa (n=112) compared to matched controls** |  | | **Other karyotypes (n=66) compared to matched controls** | |  | |  |
|  | Adjusted OR  (95% CI)b |  |  | | Adjusted OR  (95% CI)b |  | p for homogeneity between the groupsc | | |
| IL-6 | 1.12 (1.03–1.21) |  |  | | 1.08 (0.98–1.19) |  | 0.60 | | |
| sIL-6Rα | 0.90 (0.83–0.98) |  |  | | 0.89 (0.91–0.89) |  | 0.90 | | |
| IL-8 | 0.89 (0.82–0.96) |  |  | | 0.87 (0.79–0.96) |  | 0.68 | | |
| IL-12 | 0.97 (0.90–1.06) |  |  | | 0.92 (0.94–1.02) |  | 0.36 | | |
| IL-17 | 1.01 (0.93–1.10) |  |  | | 1.07 (0.97–1.18) |  | 0.29 | | |
| IL-18 | 1.06 (0.98–1.14) |  |  | | 1.07 (0.98–1.18) |  | 0.77 | | |
| TGF-β1 | 0.88 (0.82–0.96) |  |  | | 0.87 (0.79–0.96) |  | 0.84 | | |
| MCP-1 | 0.82 (0.75–0.89) |  |  | | 0.83 (0.75–0.92) |  | 0.83 | | |
| CRP | 0.86 (0.79–0.93) |  |  | | 0.94 (0.85–1.03) |  | 0.15 | | |

CI, confidence interval, CRP, C-reactive protein; IL, interleukin; MCP, monocyte chemotactic protein; OR, odds ratio, sIL-6R, IL-6 soluble receptor; TGF, transforming growth factor.

Conditional logistic regression with inflammatory markers ranked according to percentiles divided by 10 and modelled linearly.

a Prenatally initiated karyotypes included high-hyperdiploidy and *ETV6-RUNX1*-positive ALL.

b ORs were adjusted for birth weight (continuous in 500-g intervals) and maternal age at delivery (continuous).

c Wald test for homogeneity between ORs for the prenatally initiated karyotypes and ORs for the other karyotypes.
